# Supplementary material for: Class III Peroxidases in the Peach (Prunus persica): Genome-Wide Identification and Functional Analysis
Source: MDPI journal article supplement (doi:10.3390/plants13010127), 2024-01-02
Supplement: s1 [file s1]

Table S1. Characteristics of peach cultivars

| Cultivar characteristic               | Cultivars                                                                                                                                                 |                                                                                                                                                                                                                                                |                                                                                                                                                                       |                                                                                                                                                                                                                                        |                                                                                                  |                                  |
|---------------------------------------|-----------------------------------------------------------------------------------------------------------------------------------------------------------|------------------------------------------------------------------------------------------------------------------------------------------------------------------------------------------------------------------------------------------------|-----------------------------------------------------------------------------------------------------------------------------------------------------------------------|----------------------------------------------------------------------------------------------------------------------------------------------------------------------------------------------------------------------------------------|--------------------------------------------------------------------------------------------------|----------------------------------|
|                                       | “Asmic”                                                                                                                                                   | “Springold”                                                                                                                                                                                                                                    | “Fantasia”                                                                                                                                                            | “Venus”                                                                                                                                                                                                                                | “Cold Princess”                                                                                  | “21th Century”                   |
| <i>Frost resistance</i>               | cold-tolerant (Sychoy, 2018)                                                                                                                              | cold-tolerant (Moale et al., 2013, 2016)                                                                                                                                                                                                       | -cultivars with a medium break of dormancy (Horsáková, Krška, 2016)<br>-cold-tolerant (Scorza, Okie, 1991)                                                            | -cold-tolerant (Szalay et al., 1999)                                                                                                                                                                                                   | cold-tolerant (Li et al., 2021)                                                                  | cold-sensitive (Li et al., 2021) |
| <i>Drought resistance</i>             | drought-resistant (Fedorova et al., 2021; Tsiupka et al., 2022)                                                                                           | drought-resistant (Steinberg et al., 1988; Ivashchenko et al., 2017, Tsiupka et al., 2023)                                                                                                                                                     | drought-resistant                                                                                                                                                     | drought-resistant                                                                                                                                                                                                                      | -                                                                                                | -                                |
| <i>Resistance to biotic stressors</i> | <i>Taphrina deformans</i> – resistant,<br><i>Sphaerotheca pannosa</i> – medium resistance/<br>sensitiv;<br><i>Clasterosporium carpophilum</i> - resistant | <i>Taphrina deformans</i> – medium resistance;<br><i>Cytospora cincta</i> - medium resistance/<br>sensitiv;<br><i>Monilinia Laxa</i> - medium resistance/<br>sensitiv;<br><i>Monilinia Fructigena</i> - medium resistance (Moale et al., 2022) | <i>Taphrina deformans</i> – medium resistance;<br><i>Cytospora cincta</i> - medium resistance;<br><i>Sphaerotheca pannosa</i> – medium resistance (Melnichenko, 2008) | <i>Taphrina deformans</i> – resistance;<br><i>Cytospora cincta</i> – medium resistance;<br><i>Sphaerotheca pannosa</i> – medium resistance;<br><i>Clasterosporium carpophilum</i> – medium sensitiv                                    | -                                                                                                | -                                |
| <i>Fruit characteristics</i>          | Large-fruited variety (Sychoy, 2018), medium-late ripening (end of July), flesh color - white, fruit consistency - fibrous (Smykov et al., 2015)          | Medium and small fruits (Okie, 1998); Spherical, yellow with 30% red<br>Yellow, firm, good quality (Gavăț, 1990), mid-ripening (early July), green-meaty, fibrous, the bone comes off (Smykov                                                  | Slow maturing phenotype (Farinati, 2021)<br>Round-oval, sweet and sour nectarine with detachable stone (Dirlewanger, 2006), with firm flesh (You, 2021)               | Self-fertile, high-yielding mid-early nectarine cultivar. the fruits are red-yellow attractive in color, large ones reaching up to 200 grams. The pulp is yellow, slightly reddish, juicy, pleasant taste, the stone does not separate | Spherical or flattened shape, large, hard texture, red skin, but white pulp, slightly sour taste |                                  |

|  |  |               |  |                                                                                                       |  |  |
|--|--|---------------|--|-------------------------------------------------------------------------------------------------------|--|--|
|  |  | et al., 2015) |  | from the pulp.<br>(Carrasco-<br>Valenzuela et<br>al., 2019;<br>Balsells-<br>Llauradó et al.,<br>2023) |  |  |
|--|--|---------------|--|-------------------------------------------------------------------------------------------------------|--|--|
